# Supplementary material for: Fractional re-distribution among cell motility states during ageing
Source: PubMed Central journal article supplement (PMC7815872; doi:10.1038/s42003-020-01605-w), 2021-01-19
Supplement: 42003_2020_1605_MOESM3_ESM.pdf [file 42003_2020_1605_MOESM3_ESM.pdf]

## Description of Additional Supplementary Files

**File name: Supplementary Data 1.**

**Description:** Name and age for samples used in this study

**File name: Supplementary Data 2.**

**Description:** Text file containing the x-y coordinates for all cells analyzed and presented, column 1 denotes the donor ID, column 2 denotes the cell ID, column 3 indicates the tracking frame number (per 2 mins), and column 4 and 5 denotes the x and y coordinates respectively.

**File name: Supplementary Data 3.**

**Description:** Mean values and z-scores for the 10 bulk motility parameters per age

**File name: Supplementary Data 4.**

**Description:** p-values indicating enrichments and depletions for each spatial cluster per age based on null hypothesis testing.

**File name: Supplementary Data 5.**

**Description:** p-values indicating enrichments and depletions for each activity cluster per age based on null hypothesis testing.

**File name: Supplementary Data 6.**

**Description:** p-values indicating enrichments and depletions for spatial clusters per activity cluster based on null hypothesis testing.

**File name: Supplementary Data 7.**

**Description:** p-values indicating enrichments and depletions for spatial clusters per activity cluster for each age group based on null hypothesis testing.
